# Supplementary material for: Core structural shifts in procaryotic and fungal rhizosphere biomes of barley subjected to early waterlogging
Source: Research Square preprint supplement (doi:10.21203/rs.3.rs-8584385/v1), 2026-01-20
Supplement: Supplementary file 1 [file 043ee6776932ad7593a1d213.docx]

Table S1: Results of linear mixed-effect models (LMM) showing the effect of watering treatment on alpha diversity indices of bacterial and fungal community. The model includes genotype as a random effect. The fixed effects include the intercept and the treatment ("Waterlogged").

| Formula (For Bacteria) | lme (Shannon Index ~ Treatment, random = ~ 1|Genotype) | | | | |
| --- | --- | --- | --- | --- | --- |
| Fixed effects | Coefficient | Standard Error | Degree of freedom | t-value | p-value |
| Intercept | 6.171789 | 0.05331936 | 29 | 115.75137 | 0 |
| TreatmentWaterlogged | -0.038354 | 0.07540497 | 29 | - 0.50865 | 0.6148 |

| **Formula (For Bacteria)** | **lme (Observed Richness ~ Treatment, random = ~ 1|Genotype)** | | | | |
| --- | --- | --- | --- | --- | --- |
| **Fixed effects** | Coefficient | Standard Error | Degree of freedom | t-value | p-value |
| **Intercept** | 816.55 | 51.90078 | 29 | 15.732906 | 0 |
| **TreatmentWaterlogged** | -70.80 | 73.39878 | 29 | - 0.964594 | 0.3427 |

| **Formula (For Fungi)** | **lme (Shannon Index~ Treatment, random = ~ 1|Genotype)** | | | | |
| --- | --- | --- | --- | --- | --- |
| **Fixed effects** | Coefficient | Standard Error | Degree of freedom | t-value | p-value |
| **Intercept** | 3.950288 | 0.06034623 | 29 | 65.46040 | 0 |
| **TreatmentWaterlogged** | 0.061527 | 0.08505728 | 29 | - 0.72336 | 0.4753 |

| **Formula (For Fungi)** | **lme (Observed Richness~ Treatment, random = ~ 1|Genotype)** | | | | |
| --- | --- | --- | --- | --- | --- |
| **Fixed effects** | Coefficient | Standard Error | Degree of freedom | t-value | p-value |
| **Intercept** | 354.70 | 10.71772 | 29 | 33.09474 | 0 |
| **TreatmentWaterlogged** | -15.05 | 15.15714 | 29 | -0.99293 | 0.329 |

Table S2: PERMANOVA analysis to show the effect of barley genotypes, watering treatment, and their interactions on the bacterial and fungal community structure.

| Variable | Degree of freedom | R2 (%) | F | Pr (>F) |
| --- | --- | --- | --- | --- |
| **For Bacteria** | | | | |
| Genotype | 9 | 0.17243 | 1.0510 | 0.365 |
| Water treatment | 1 | 0.27833 | 15.2683 | 0.001 |
| Genotype: Treatment | 9 | 0.18466 | 1.1256 | 0.222 |
| **For Fungi** | | | | |
| Genotype | 9 | 1.0316 | 1.0821 | 0.164 |
| Water treatment | 1 | 0.097 | 4.4115 | 0.001 |
| Genotype: Treatment | 9 | 0.20835 | 0.9949 | 0.498 |

Table S3: Results of Redundancy Analysis (RDA) assessing the effectiveness of spatial predictors, particularly the distance between treatment fields, in explaining variation in mycobiome structure. The spatial variables were selected through forward selection procedures, retaining only the most significant predictors.

| **Formula** | **Microbiome structure ~ Distance between treatment fields** | | | | |
| --- | --- | --- | --- | --- | --- |
| **Metric** | **Total** | **Constrained** | | **Unconstrained** | |
| **For Bacteria** | | | | | |
| Inertia | 4.56834 | | 1.62477 | | 2.94357 |
| Proportion | 1.00000 | | 0.35566 | | 0.64434 |
| Rank |  | | 4 | | 39 |
| **For Fungi**  **For Fungi** | | | | | |
| Inertia | 4.6855 | | 0.72663 | | 3.9588 |
| Proportion | 1.00000 | | 0.15508 | | 0.84492 |
| Rank |  | | 4 | | 37 |

Table S4: PERMANOVA analysis to show the effect of soil and plant parameters on the bacterial and fungal community structure.

| **Variable** | **Degree of freedom** | **R2 (%)** | **F** | **Pr (>F)** |
| --- | --- | --- | --- | --- |
| **For Bacteria** | | | | |
| Plant yield | 1 | 0.0268 | 1.0472 | 0.300 |
| Total Kernal Weight | 1 | 0.0257 | 1.0034 | 0.345 |
| Shoot Fresh Mass | 1 | 0.0183 | 0.7110 | 0.790 |
| Grain Protein Content | 1 | 0.1028 | 4.3562 | **0.001** |
| Plant Height | 1 | 0.0183 | 0.7089 | 0.791 |
| Flowering Time | 1 | 0.0498 | 1.9923 | **0.029** |
| Nitrogen | 1 | 0.0200 | 0.7792 | 0.635 |
| Carbon | 1 | 0.0270 | 1.0555 | 0.302 |
| Phosphorous | 1 | 0.2223 | 10.8676 | **0.001** |
| Potassium | 1 | 0.0203 | 0.7899 | 0.615 |
| Soil pH | 1 | 0.1468 | 6.5417 | **0.001** |
| Magnesium | 1 | 0.1058 | 4.4975 | **0.001** |
| Zinc | 1 | 0.1880 | 8.7997 | **0.001** |
| Copper | 1 | 0.0229 | 0.8921 | 0.470 |
| Manganese | 1 | 0.1759 | 8.1117 | **0.001** |
| Soil Organic Matter | 1 | 0.2277 | 11.206 | **0.001** |
| Field Distance | 4 | 1.6248 | 4.8298 | **0.001** |
| **For Fungi** | | | | |
| Plant yield | 1 | 0.0275 | 1.0754 | 0.26 |
| Total Kernal Weight | 1 | 0.0241 | 0.9396 | 0.552 |
| Shoot Fresh Mass | 1 | 0.0265 | 1.0366 | 0.331 |
| Grain Protein Content | 1 | 0.0526 | 2.1105 | **0.002** |
| Plant Height | 1 | 0.0255 | 0.9951 | 0.415 |
| Flowering Time | 1 | 0.0341 | 1.3432 | 0.074 |
| Nitrogen | 1 | 0.0190 | 0.7390 | 0.943 |
| Carbon | 1 | 0.0264 | 1.0304 | 0.355 |
| Phosphorous | 1 | 0.0918 | 3.8413 | **0.001** |
| Potassium | 1 | 0.0308 | 1.2078 | 0.134 |
| Soil pH | 1 | 0.0836 | 3.4692 | **0.001** |
| Magnesium | 1 | 0.0703 | 2.8756 | **0.002** |
| Zinc | 1 | 0.0979 | 4.1272 | **0.001** |
| Copper | 1 | 0.0385 | 1.5216 | 0.041 |
| Manganese | 1 | 0.0529 | 2.1259 | **0.002** |
| Soil Organic Matter | 1 | 0.0719 | 2.9447 | **0.001** |
| Field Distance | 4 | 0.7266 | 1.606 | **0.001** |

*p values in bold indicate the statistical significance

Table S5: Comparison of the characteristics of observed and ensemble (null) bacterial and Fungal networks

|  | NODF | Functional Complementarity | Niche Overlap | Modularity |
| --- | --- | --- | --- | --- |
| **For Bacteria** | | | | |
| Observed control network | 43.71 | 3199.55 | 0.2417 | 0.2051 |
| Ensemble networks | 46.691 ± 0.273 | 3849.060 ± 29.135 | 0.259 ± 0.002 | 0.1596±0.001 |
| z-score | -10.8665 | -22.29304 | -8.347454 | 34.873 |
| **For Fungi** | | | | |
| Observed control network | 35.119 | 1846.294 | 0.1808 | 0.1968 |
| Ensemble networks | 39.135 ± 0.327 | 1933.074 ± 21.895 | 0.202 ± 0.002 | 0.176 ± 0.002 |
| z-score | -12.294 | -3.9633 | -8.740767 | 12.45329 |


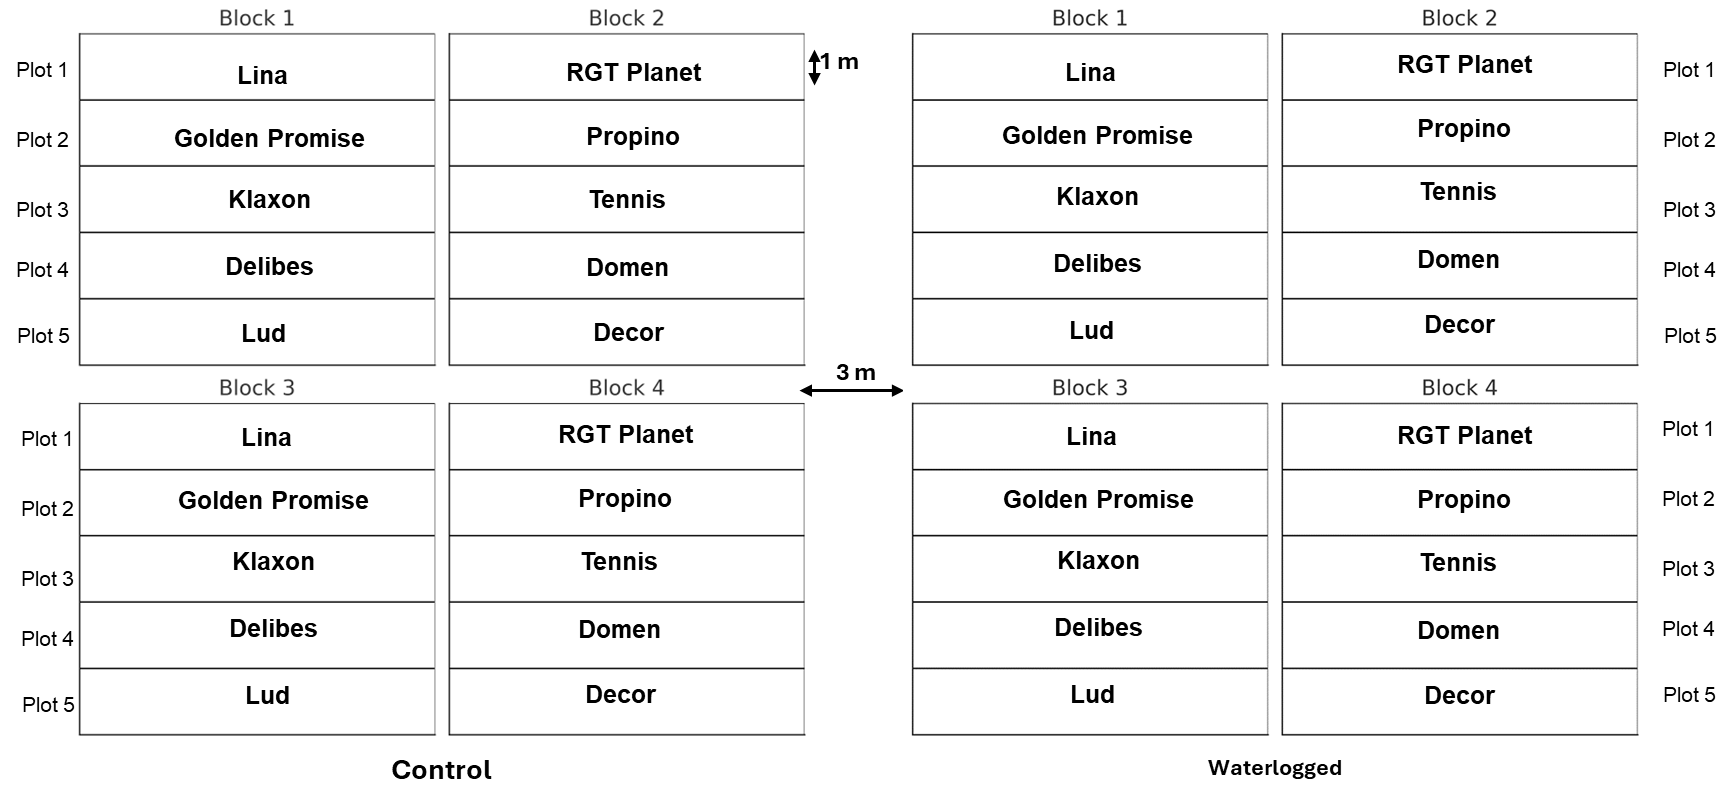


Figure S1. Schematic representation of the field experiment layout, depicting control and waterlogging treatments conducted on 10 barley cultivars.


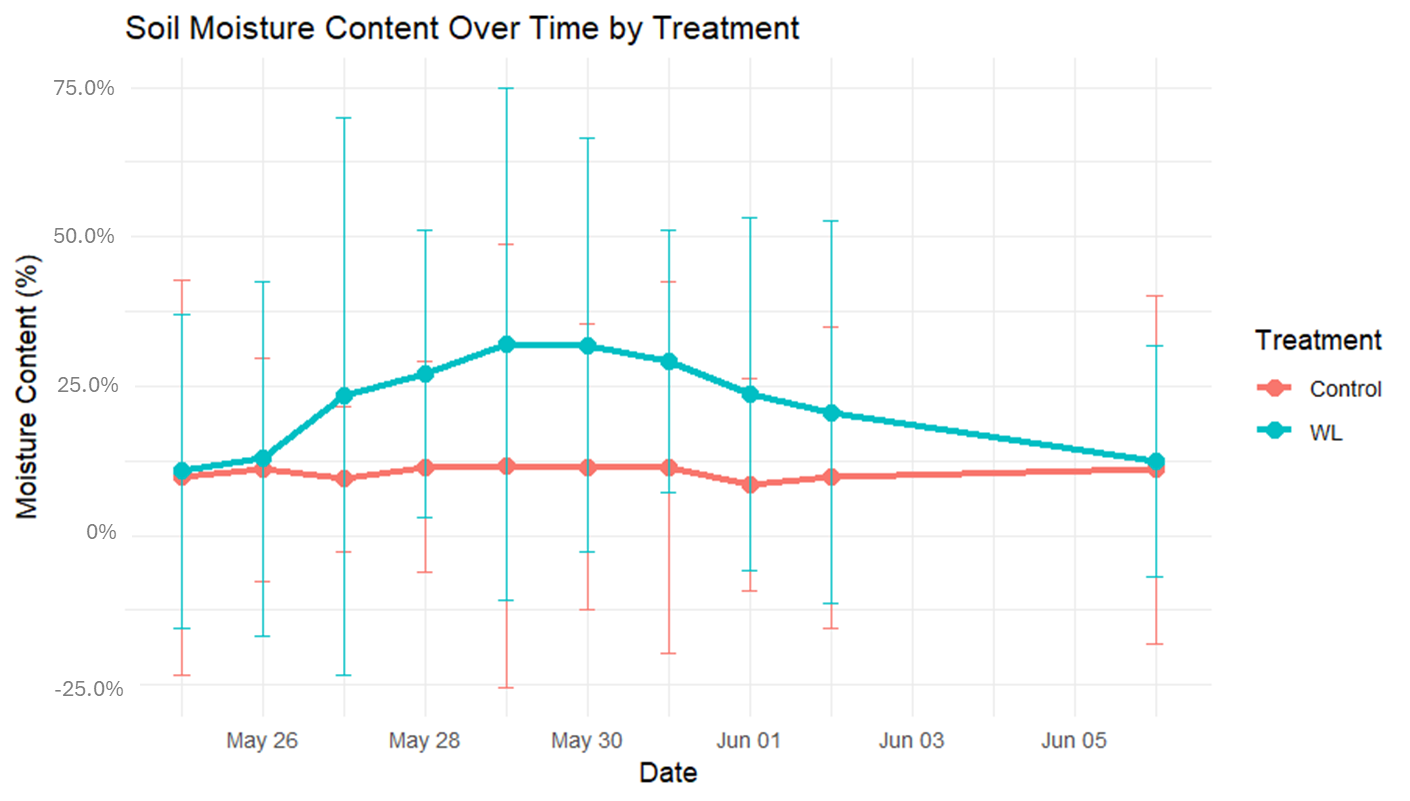


Figure S2. Line graph represents the soil moisture content (%) across each successive day of waterlogging treatment of control and waterlogged field plots. Error bar represents the deviation from the mean value, where WL denotes the waterlogging field.


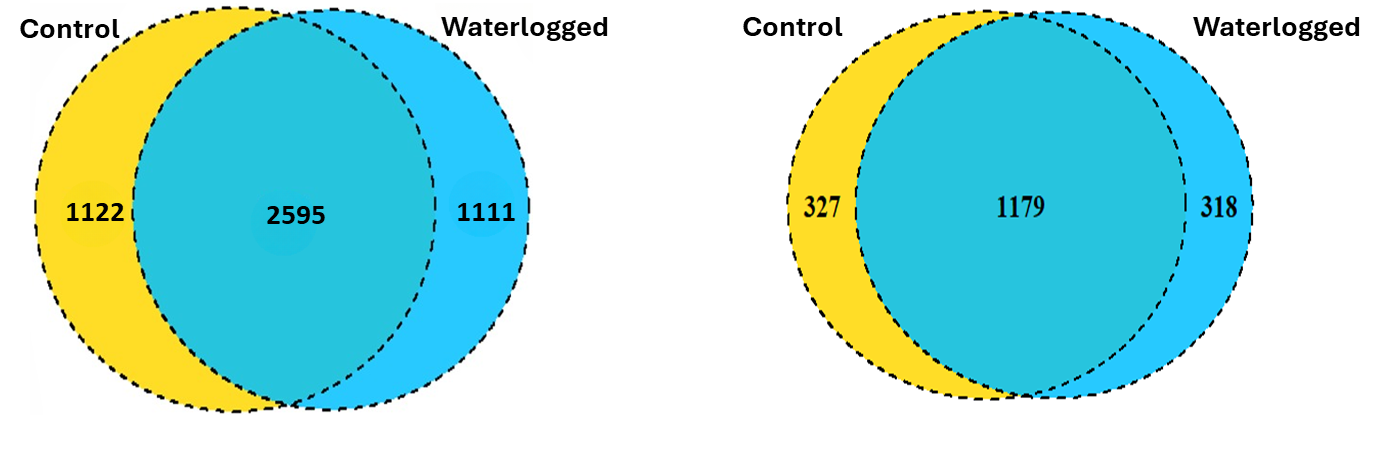


Figure S3: Venn diagrams illustrating the total number of unique and shared ASVs of bacteria (left) and fungi (right) across control and waterlogging conditions, regardless of barley genotypes.


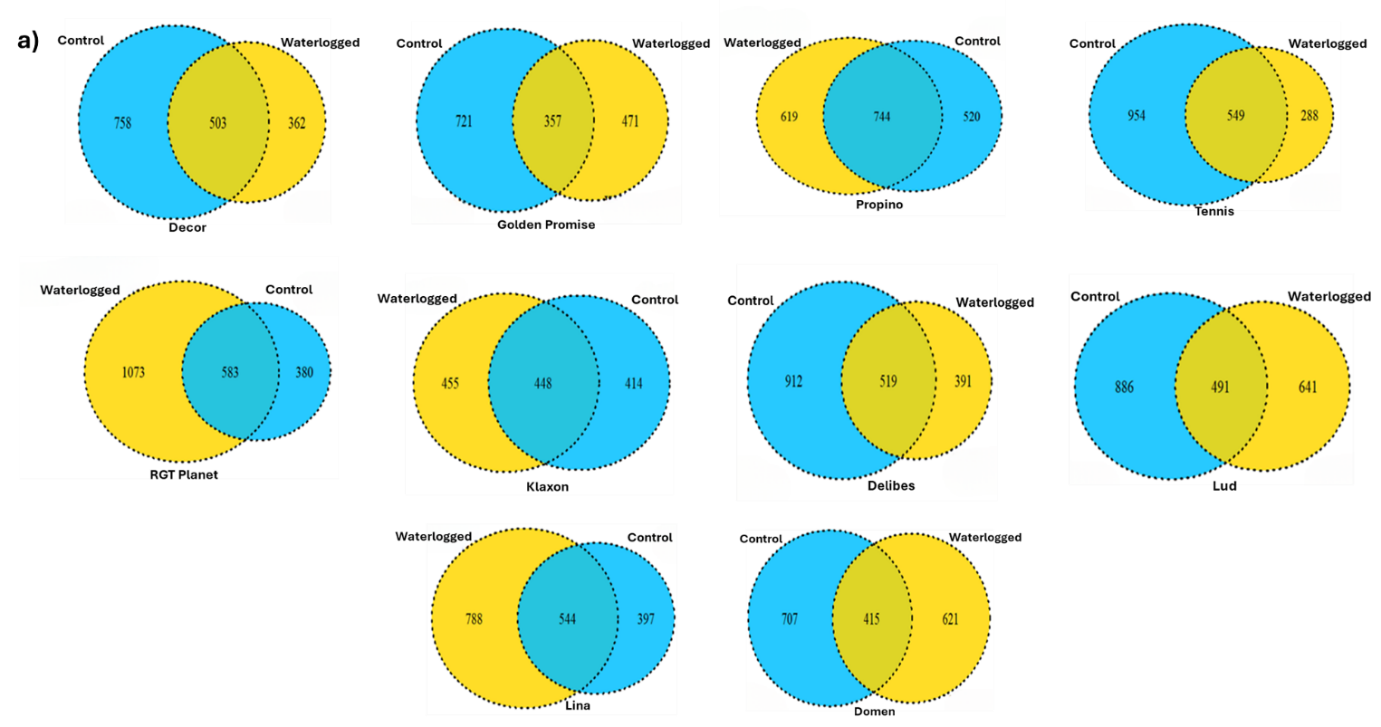


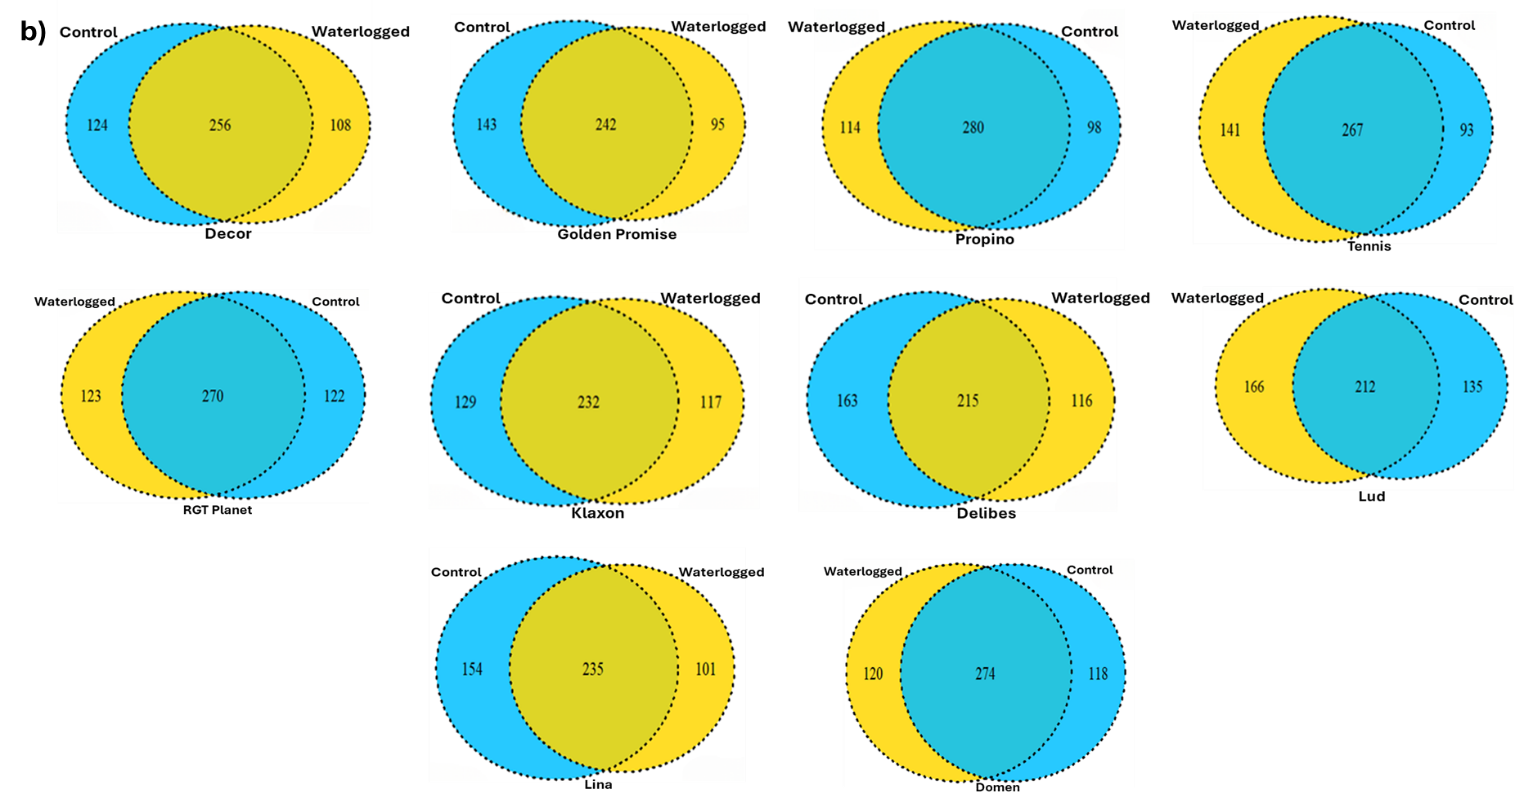


Figure S4: Venn diagrams illustrating the shared and unique bacterial (a) and fungal (b) amplicon sequence variants (ASVs) between control and waterlogged treatments across each of the ten barley cultivars.


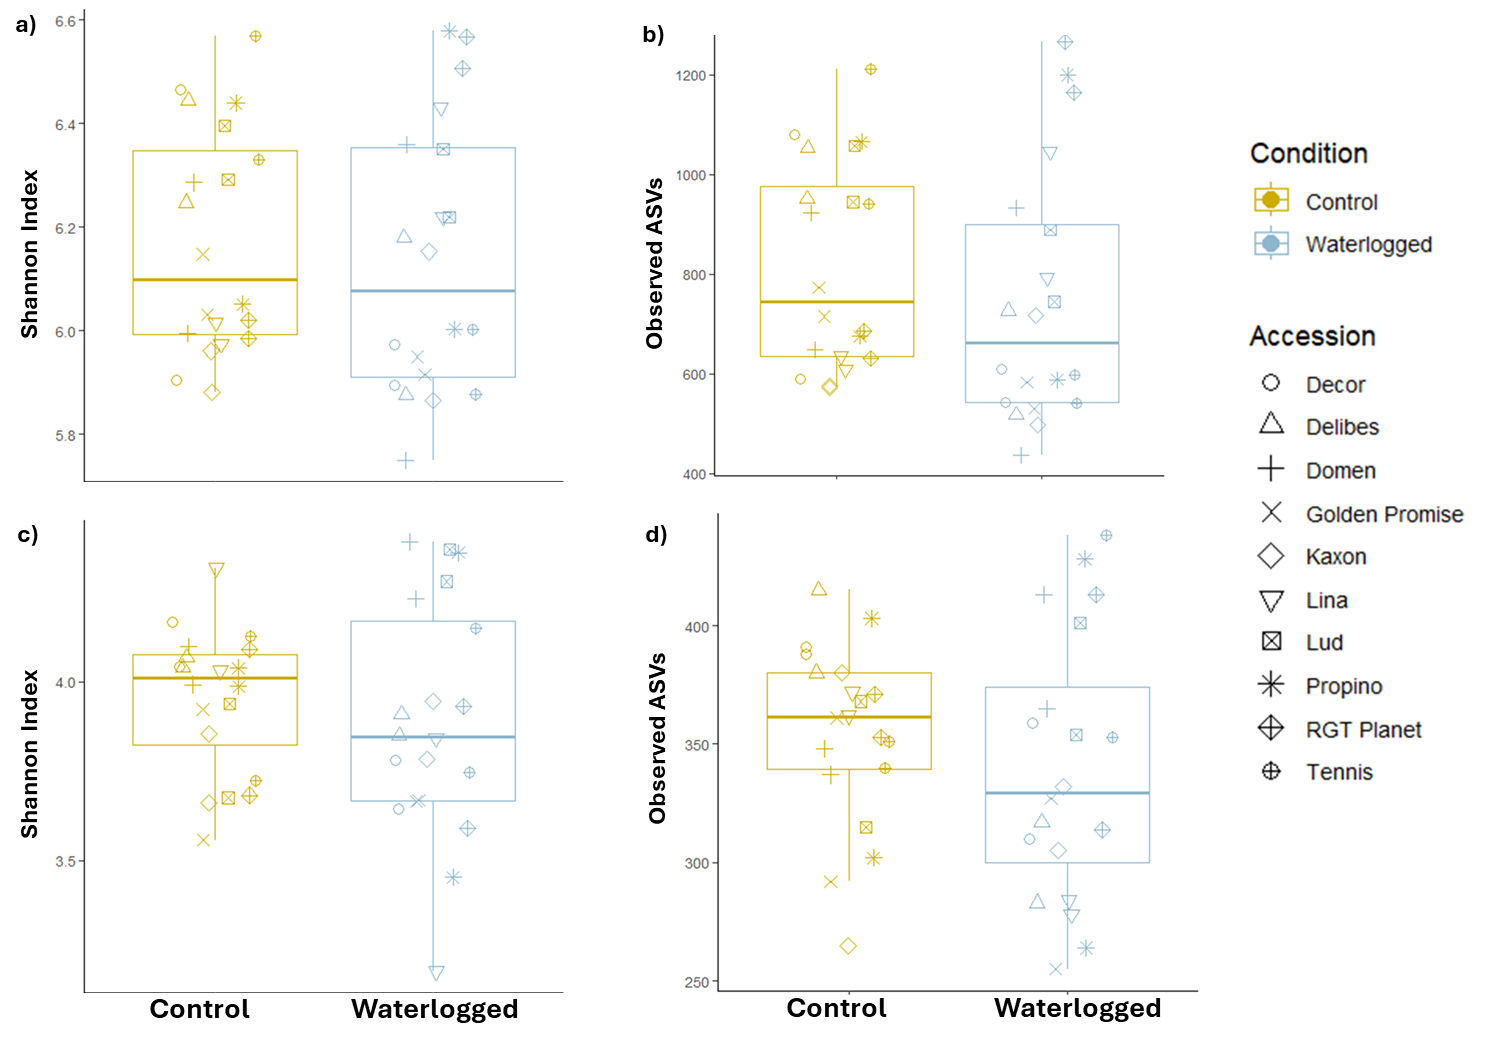


Figure S5: Boxplots showing the distribution of Shannon diversity (left) and Observed ASVs (right) across watering treatments. Panels a) and b) display data for bacteria, while panels c) and d) represent fungi. The boxplots illustrate the median and interquartile range, with each data point corresponding to a barley cultivar.


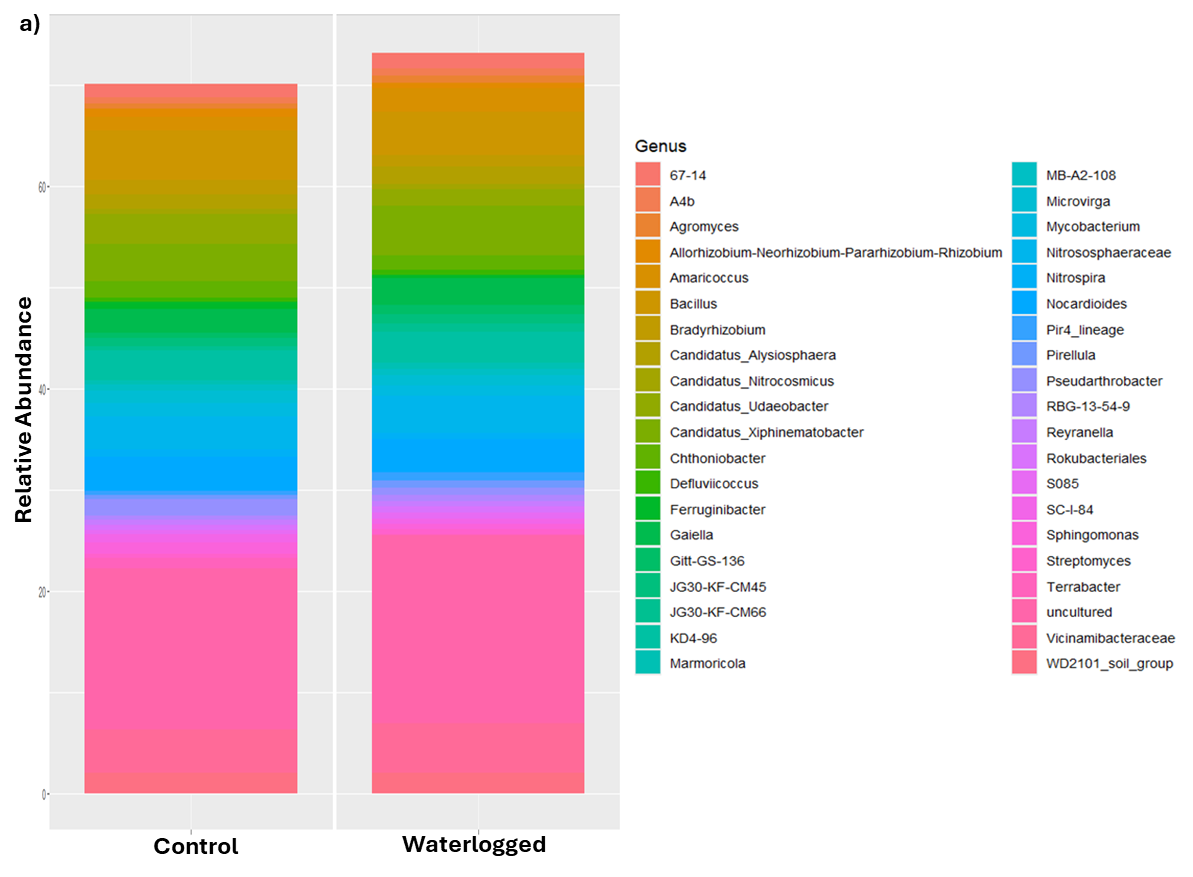


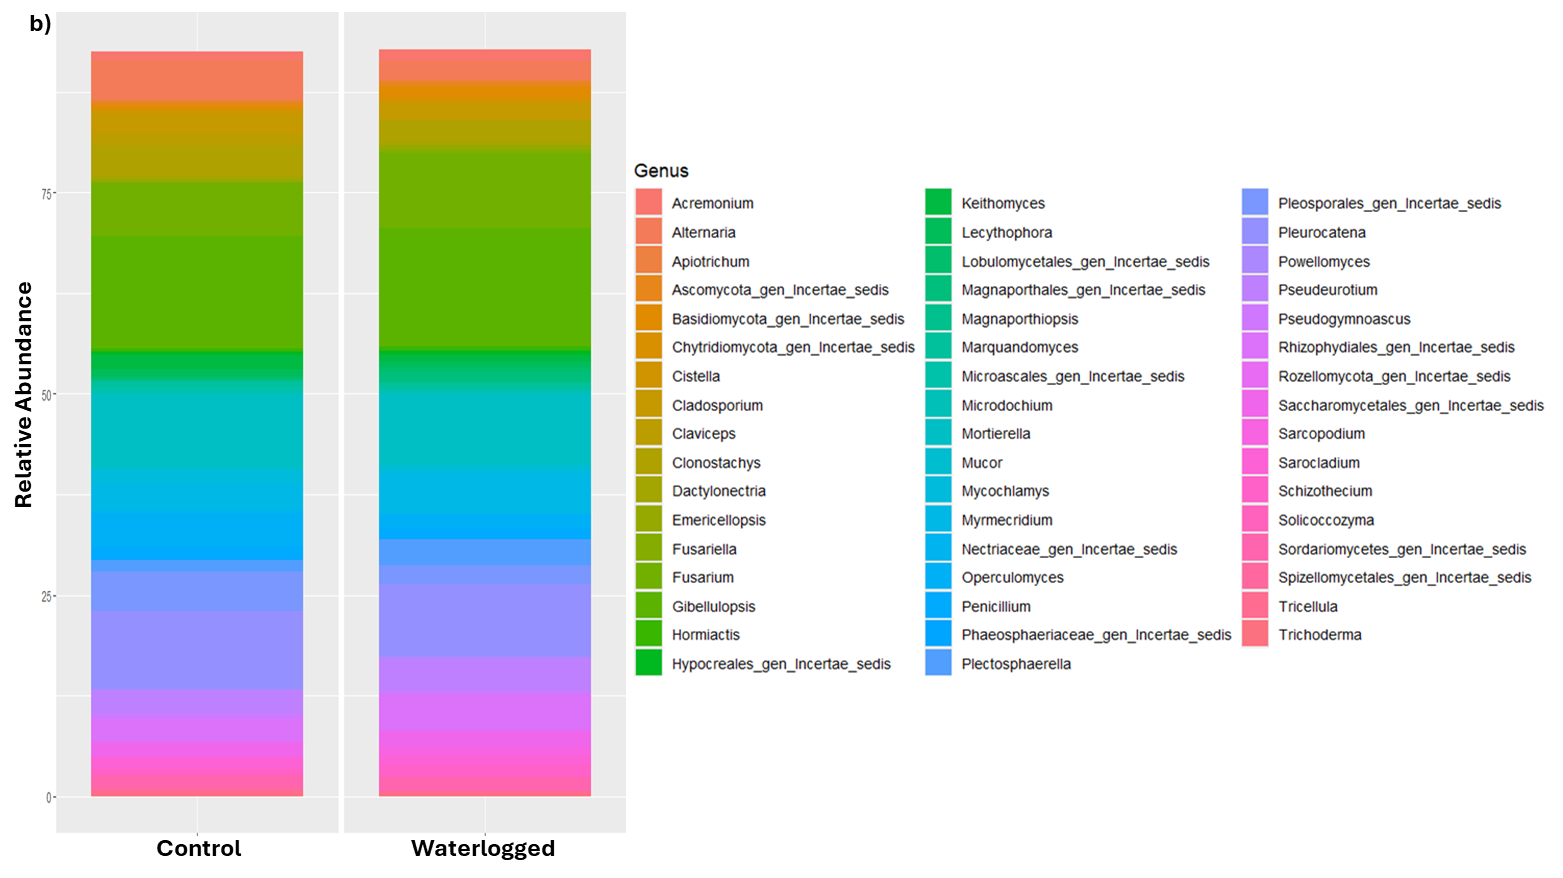


Figure S6: Relative abundance profiles of the top 50 bacterial (a) and fungal (b) genera in control versus waterlogged conditions.


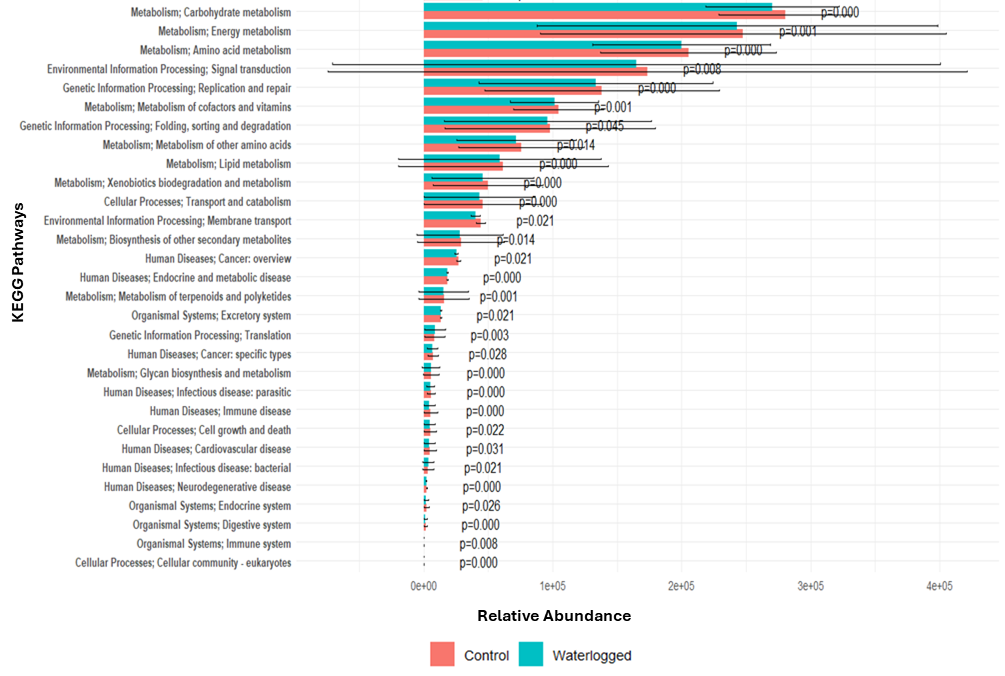


Figure S7: Differential abundance of significant annotated pathways at the Class level between Control and Waterlogged conditions based on the Limma Voom method. Error bars indicate variability, with p-values less than 0.05 showing statistical significance.


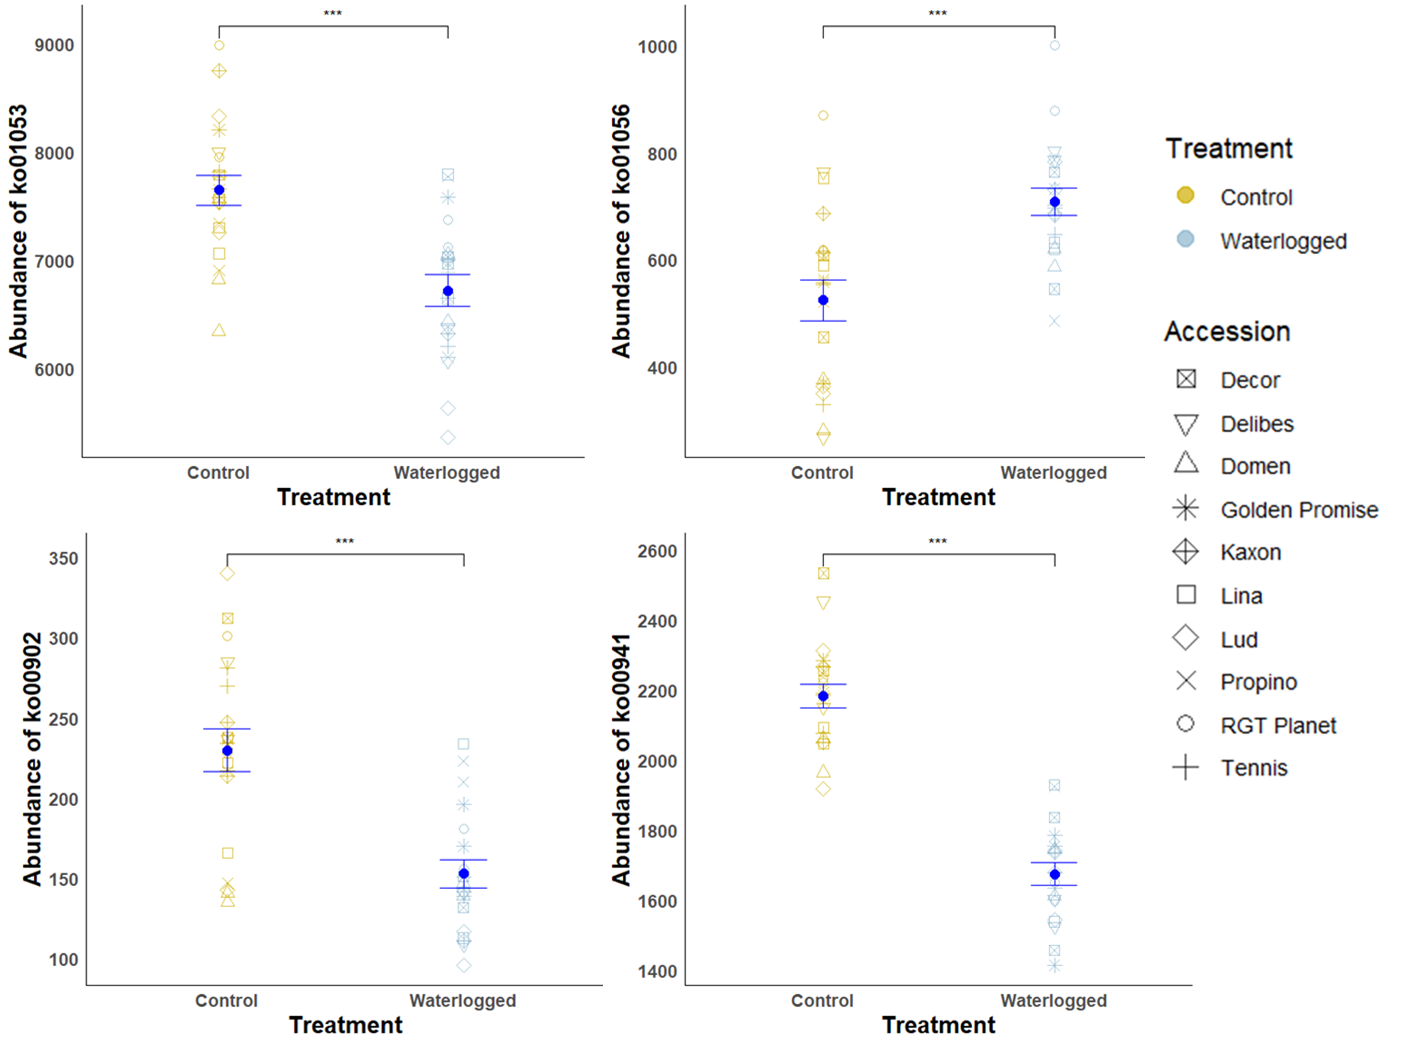


Figure S8: Scatter plots show the abundance of significant features 'Biosynthesis of siderophore group nonribosomal peptides' (KO01053), 'Biosynthesis of type II polyketide backbone' (KO01056), 'Monoterpenoid biosynthesis' (KO00902), and 'Flavonoid biosynthesis' (KO00941) for both control and waterlogged conditions with mean and error bars indicated. Asterisks indicate statistical significance (t-tests, p < 0.05).


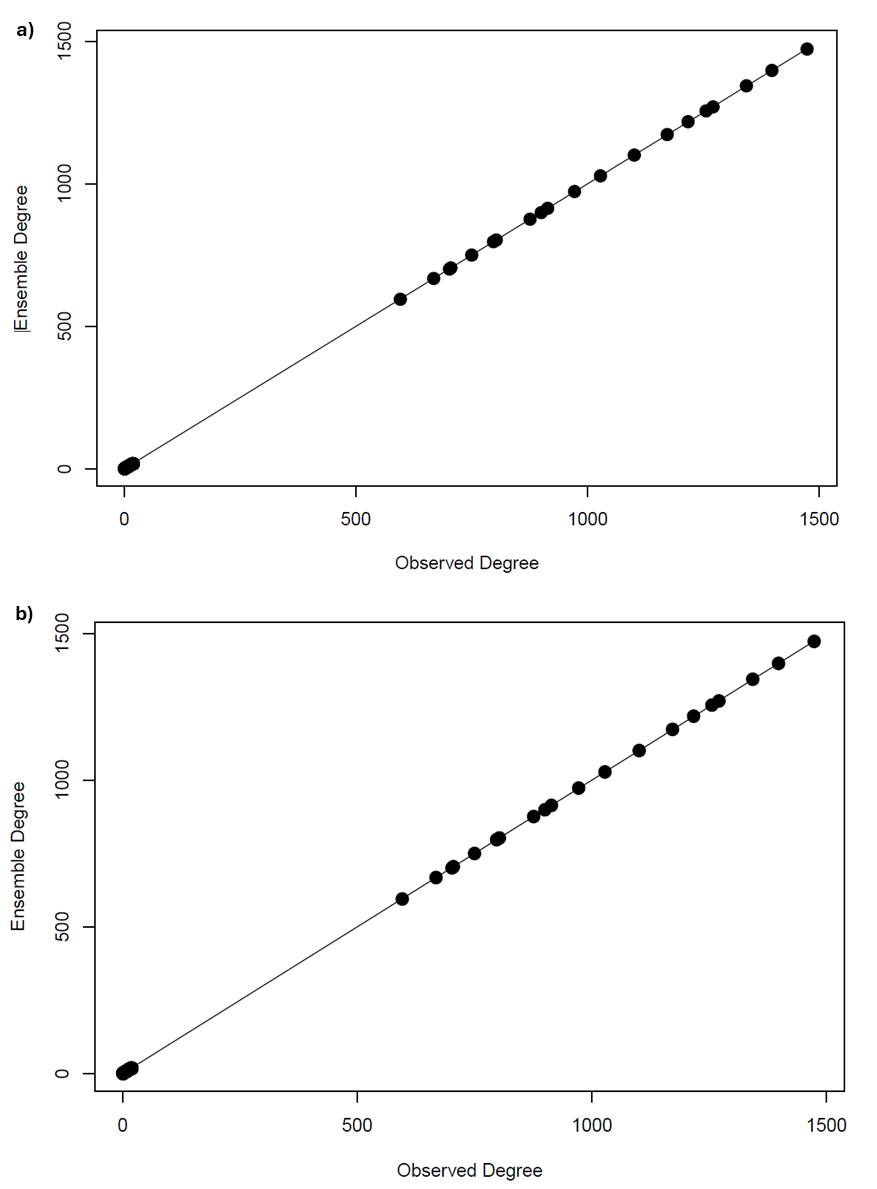


Figure S9: Comparison of observed and ensemble node degrees for canonical network ensemble validation of a) bacterial network, b) fungal network under control and waterlogging conditions.


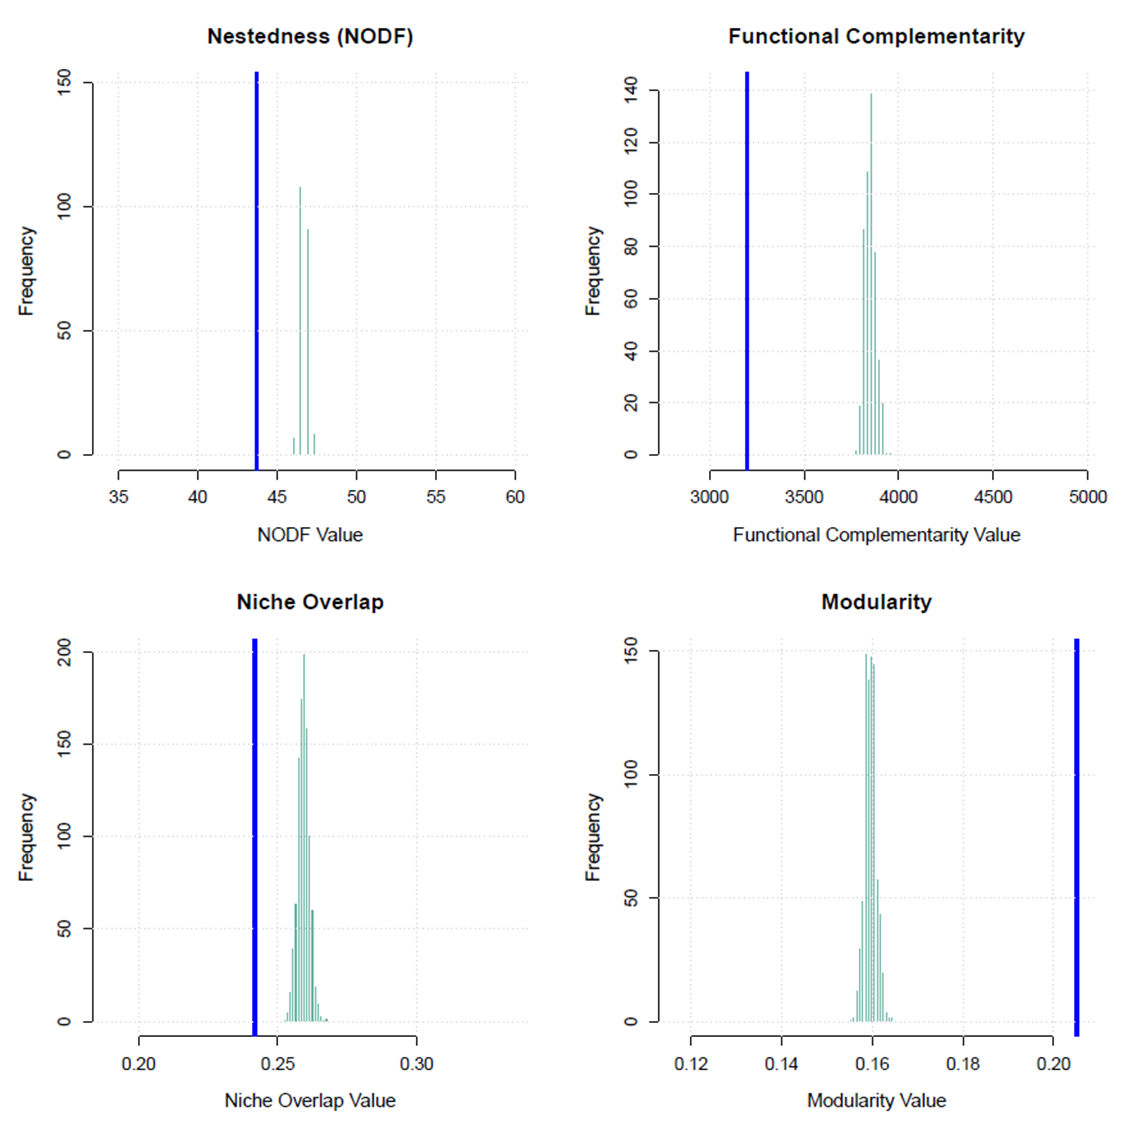


Figure S10: Distribution of four Binary Network Metrics for the Canonical Ensemble of Bacterial Network in control and waterlogging treatment: Comparison of Ensemble (Histogram) and Observed (Blue Line) Values.


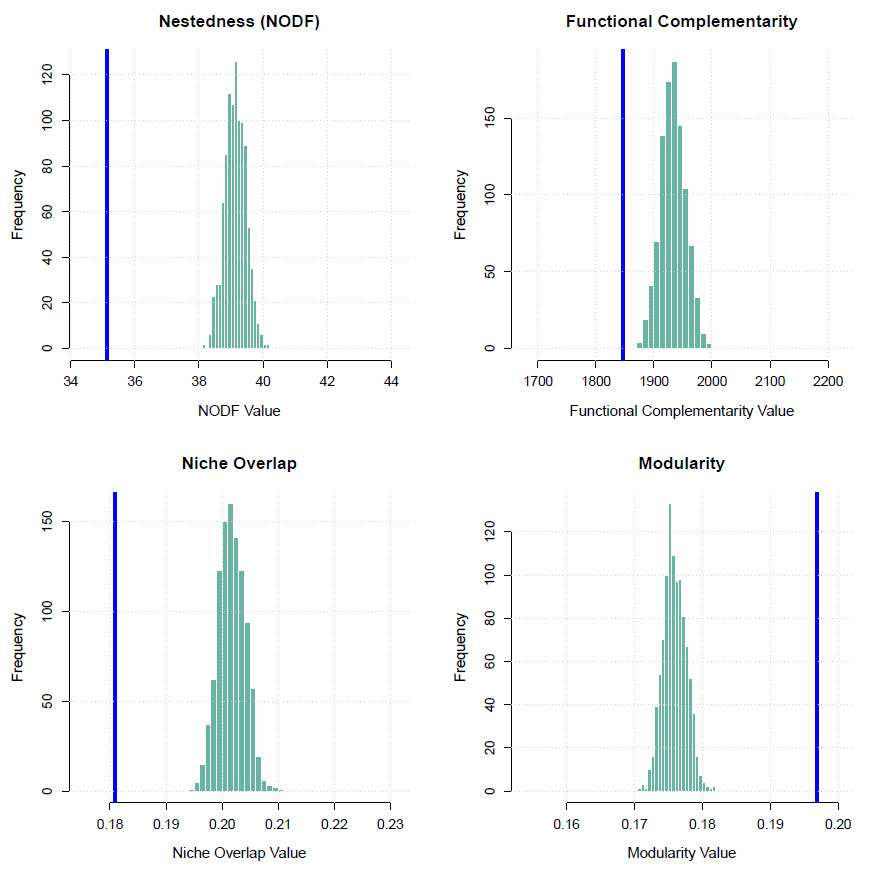


Figure S11: Distribution of Four Binary Network Metrics for the Canonical Ensemble of Fungal Networks in control and waterlogging treatment: Comparison of Ensemble (Histogram) and Observed (Blue Line) Values.
